# Supplementary material for: Kinetics of naturally induced binding and neutralizing anti-SARS-CoV-2 antibody levels and potencies among Kenyan patients with diverse grades of COVID-19 severity
Source: bioRxiv or medRxiv preprint supplement (doi:10.1101/2022.10.05.22280716), 2022-10-05
Supplement: Supplementary file [file media-1.pdf]

## Supplementary Material

### Supplementary Figures and Tables

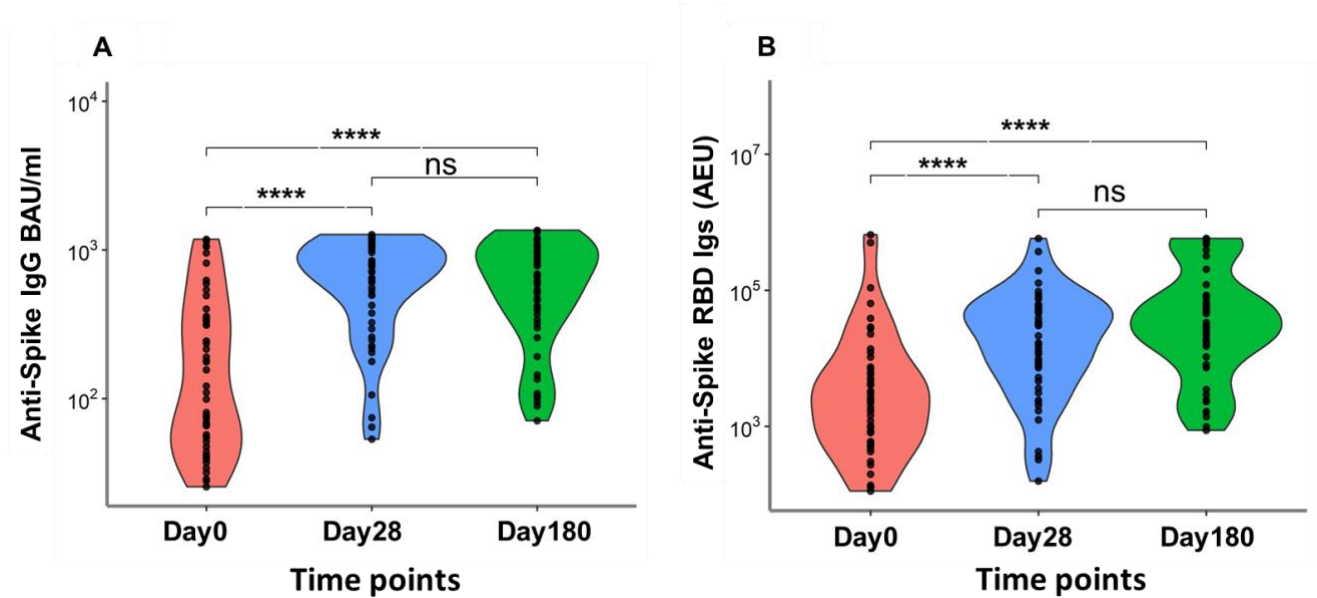

- Supplementary Figure 1: Kinetics of antibody levels (A) Anti-spike IgG BAU/ml and (B) Anti-spike RBD Igs (AEU), in a subgroup of 51 COVID-19 patients. Subgroup was used in the neutralizing assay. Calculations were done with the Friedman's test for repeated measures with Pairwise Wilcoxon signed-rank test for multiple comparison correction.  $P < 0.05$ ,  $**P < 0.01$ ,  $***P < 0.001$ ,  $****P < 0.0001$ .

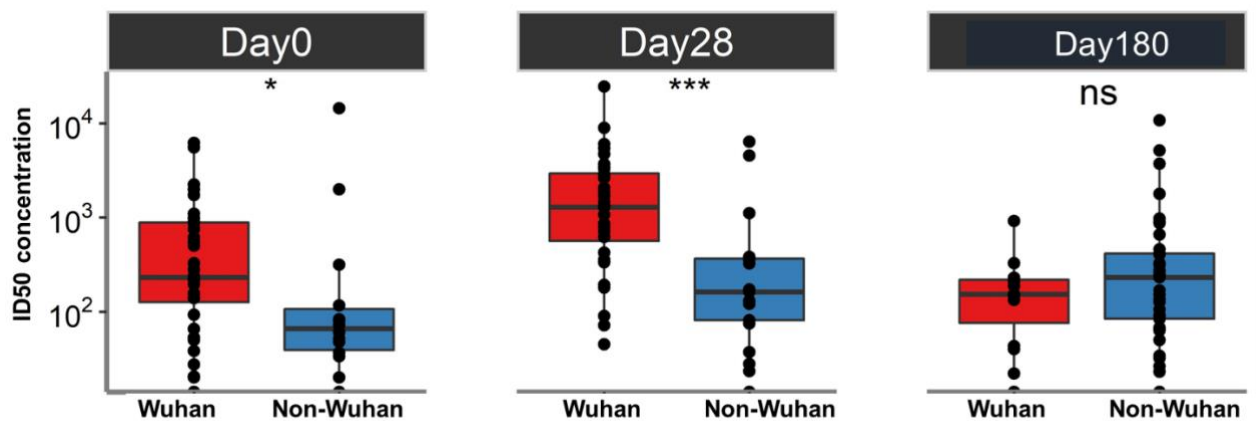

- Supplementary Figure 2: Cross-reactive neutralization. Comparison of neutralizing ID<sub>50</sub> of samples collected early in the pandemic (pre-April 2021) during Wuhan strain prevalence and those collected later in the pandemic (post-April 2021) during the prevalence of other non-Wuhan strains such as alpha, beta, delta and omicron. Comparison's done using a Mann Whitney U test.  $P < 0.05$ ,  $**P < 0.01$ ,  $***P < 0.001$ ,  $****P < 0.0001$ .

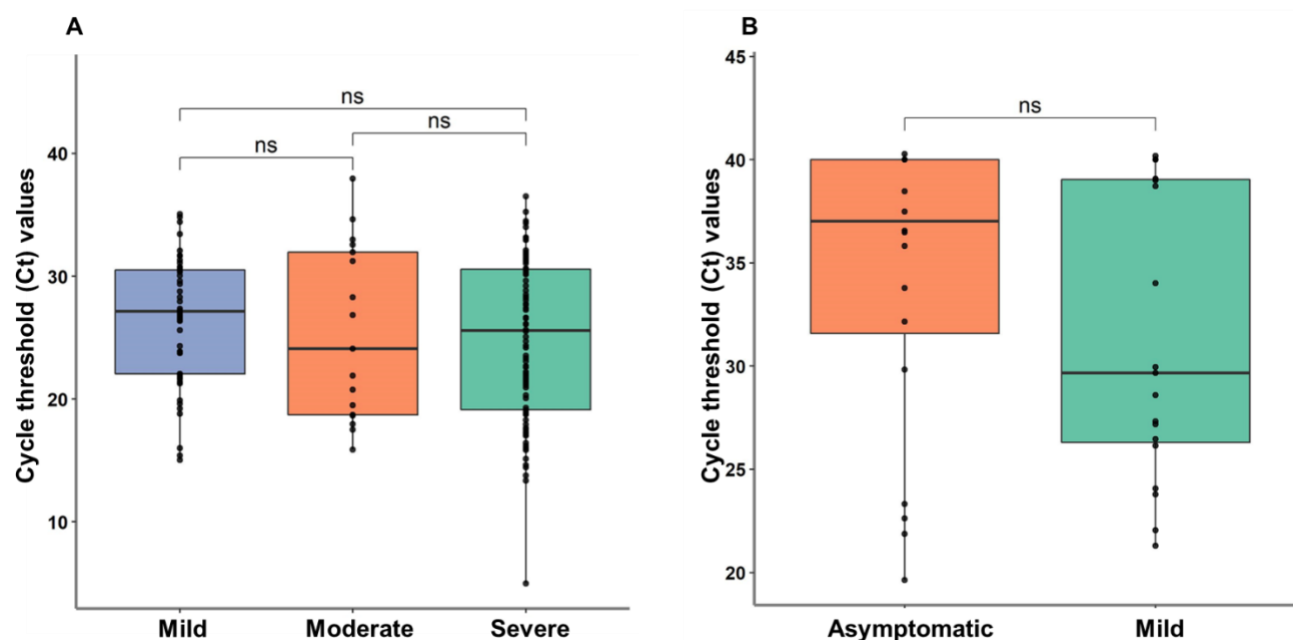

3. Supplementary Figure 3: Viral load comparisons among clinical groups. (A) RT PCR tests done in AKUH, Nairobi and (B) KCH, Kilifi. Calculated using Kruskal-Walli's test and Man Whitney U test respectively.  $P < 0.05$ ,  $**P < 0.01$ ,  $***P < 0.001$ ,  $****P < 0.0001$ .

### Supplementary Tables

1. Supplementary Table 1: Linear mixed model outputs of association of anti-spike IgG antibodies levels with other variables. Captures patients with at least two plasma samples. Estimates indicates effect of change of the variables on measure of anti-spike IgG. The estimates are natural log transformed. Each estimate has a corresponding P value to indicate significance level.

|                    | <i>Estimate</i> | <i>Std. Error</i> | <i>Pr(&gt; t )</i> | <i>Significance level</i> |
|--------------------|-----------------|-------------------|--------------------|---------------------------|
| <i>(Intercept)</i> | 3.901206        | 0.336231          | $<2e-16$           | ***                       |
| <i>Time</i>        | 0.355905        | 0.026349          | $< 2e-16$          | ***                       |
| <i>Severity</i>    | 0.184741        | 0.058897          | 0.00213            | **                        |
| <i>Age</i>         | 0.013027        | 0.005742          | 0.02491            | *                         |
| <i>Gender</i>      | -0.146325       | 0.152025          | 0.33760            | ns                        |

Signif. codes: 0 '\*\*\*' 0.001 '\*\*' 0.01 '\*' 0.05 '.' 0.1 ' ' 1

2. Supplementary Table 2: Modelling of neutralizing antibody kinetics. Estimates indicates effect of change of the variables on measure of neutralizing antibodies (Day 0 used as reference point). Fitted effects are obtained from a linear mixed model output. Each estimate has a corresponding P value to indicate significance level.

|         | <b>Estimate (S.E)</b> | <b>Fitted Values (95% C.I)</b> | <b>p-value</b> |
|---------|-----------------------|--------------------------------|----------------|
| Day 0   | ref                   | 862.99 (104.9-1621.1)          |                |
| Day 28  | 1066.9 (403.4)        | 1929.93 (1171.8-2688.1)        | <i>0.00949</i> |
| Day 180 | -232.1 (403.4)        | 630.94 (-127.1-1389.1)         | <i>0.5664</i>  |
